# Supplementary material for: Biodegradable nanoparticle-assisted and multiplexed imaging of asymmetric RNA expressions in live cells for precise cancer diagnosis and prognosis
Source: Royal Society of Chemistry journal article supplement (doi:10.1039/d0nr07156k), 2020-01-01
Supplement: d0nr07156k1.pdf [file d0nr07156k1.pdf]

## Supporting Information

### **Biodegradable nanoparticle-assisted and multiplexed imaging of asymmetric RNA expressions in live cells for precise cancer diagnosis and prognosis**

**Xia Li,<sup>a</sup> Fang Yang,<sup>a</sup> Chunfang Gan,<sup>\*b</sup> Ruo Yuan<sup>a</sup> and Yun Xiang<sup>\*a</sup>**

*<sup>a</sup>Key Laboratory of Luminescence Analysis and Molecular Sensing, Ministry of Education, School of Chemistry and Chemical Engineering, Southwest University, Chongqing 400715, P. R. China;*

*E-mail: yunatswu@swu.edu.cn (Y. Xiang).*

*<sup>b</sup>Guangxi Key Laboratory of Natural Polymer Chemistry and Physics, Nanning Normal University, Nanning 530001, PR China;*

*E-mail: ganchunfang2008@126.com (C. Gan).*

## Supplementary Figures:

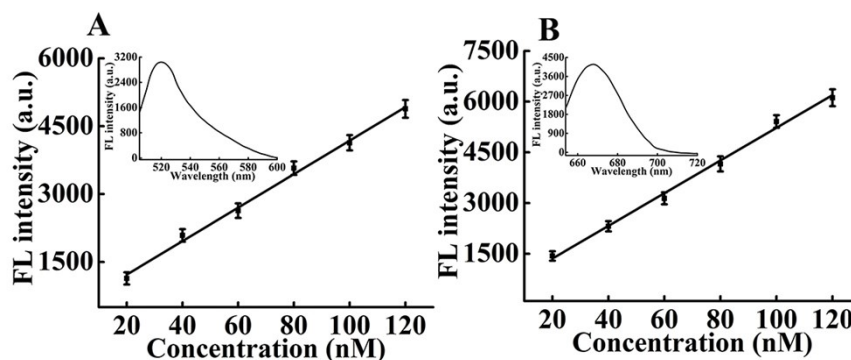

**Fig. S1** Calibration plots of fluorescence intensity vs. HP1-FAM (A) and S3-Cy5 (B) concentrations. Inset: fluorescence responses of 10 µg mL<sup>-1</sup> of Dz/HP1-FAM and S1/S2/S3-Cy5 functionalized ZnO NPs treated with Tris buffer (pH 5.0) for 30 min.

In order to calculate the conjugation efficiency, Dz/HP1-FAM (without the Dabcyl quencher) and S1/S2/S3-Cy5 (without the BHQ-2 quencher) were immobilized on ZnO-NH<sub>2</sub> nanoparticles *via* EDC/NHS. After centrifugation and Tris buffer (pH 5.0) treatment of the Dz/HP1-FAM and S1/S2/S3-Cy5 functionalized ZnO NPs for 30 min, fluorescence of the solution was measured. By comparing to the calibration curves of the HP1-FAM and S3-Cy5, the concentrations of Dz/HP1 and S1/S2/S3 on 10 µg mL<sup>-1</sup> of ZnO NPs are 67 nM and 79 nM, respectively.

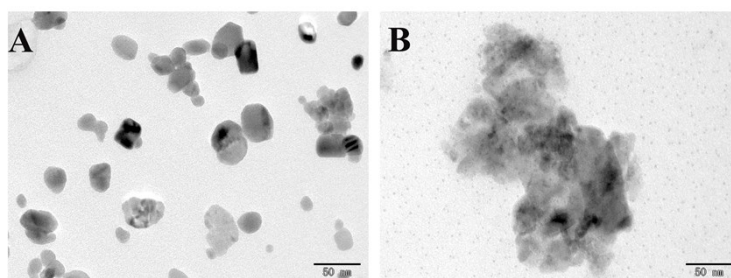

**Fig. S2** TEM images for ZnO NPs before (A) and after (B) the treatment of Tris buffer at pH = 5.0.

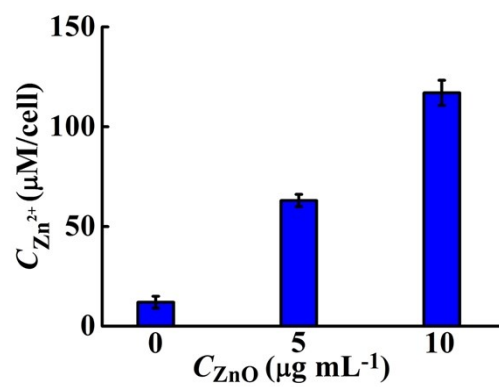

**Fig. S3** ICP-MS analysis of Zn<sup>2+</sup> in MCF-7 cells treated with 0, 5 µg mL<sup>-1</sup>, 10 µg mL<sup>-1</sup> of ZnO nanoprobes.
